# Supplementary material for: Stem cell therapy using a human fetal skin-derived scaffold for spinal cord injury engineering application
Source: Research Square preprint supplement (doi:10.21203/rs.3.rs-7020818/v1), 2025-11-07
Supplement: Supplementary file 1 [file c24de7810101e71369c44228.docx]

Editor-in-Chief,

Scientific Reports

Dear Editor-in-Chief, Dr Rafal Marszalek

On behalf of my co-authors, I am pleased to submit our manuscript entitled "Viability study of human amniotic fluid-derived stem cells on a decellularized extracellular matrix scaffold from human fetal skin for spinal cord injury engineering application" for consideration for publication in *Scientific Reports*.

Myelomeningocele (MMC) is a serious congenital neural tube defect that results in lifelong neurological impairments. Our study explores the potential use of human amniotic fluid-derived stem cells (hAFSCs) implanted on a decellularized extracellular matrix (dECM) scaffold derived from human fetal skin as a putative innovative scaffold with potential for repairing spinal cord injuries. We successfully developed a protocol for fetal skin decellularization and demonstrated the adherence and viability of hAFSCs on the dECM scaffold. Our findings suggest that this biomaterial-cell combination may serve as a promising platform for future regenerative strategies in MMC repair.

This study provides new therapeutic insights into stem cell therapies and tissue engineering techniques for fetal spinal cord injuries. Given *Scientific Reports* focus on translational research in medicine and engineering and its commitment to novel therapeutic strategies, we believe our work aligns well with the journal's scope. We hope that our findings will be of interest to your readership, particularly those exploring regenerative medicine and neural tissue engineering.

We confirm that this manuscript has not been published elsewhere and is not under consideration by any other journal. All authors have approved the final version and declare no conflicts of interest related to this work.

We appreciate your time and consideration of our submission. We look forward to your feedback and the opportunity to contribute to *Scientific Reports*.

Sincerely,

**Sérgio Cavalheiro, MD, PhD**

Discipline of Neurosurgery, Federal University of São Paulo (UNIFESP)

Pediatric Oncology Institute, GRAACC, UNIFESP

National Science and Technology Institute for Children’s Cancer Biology and Pediatric Oncology
